# Supplementary material for: Soluble CD163 predicts outcome in both chemoimmunotherapy and targeted therapy–treated mantle cell lymphoma
Source: PubMed Central journal article supplement — Blood Adv. 2023 Jul 2;7(18):5304–13. doi: 10.1182/bloodadvances.2023010052 (PMC10506048; doi:10.1182/bloodadvances.2023010052), 2023-07-02
Supplement: BLOODA_ADV-2023-010052-mmc1.pdf [file BLOODA_ADV-2023-010052-mmc1.pdf]

# Soluble CD163 predicts outcome in both chemoimmunotherapy and targeted therapy treated mantle cell lymphoma

Supplementary material

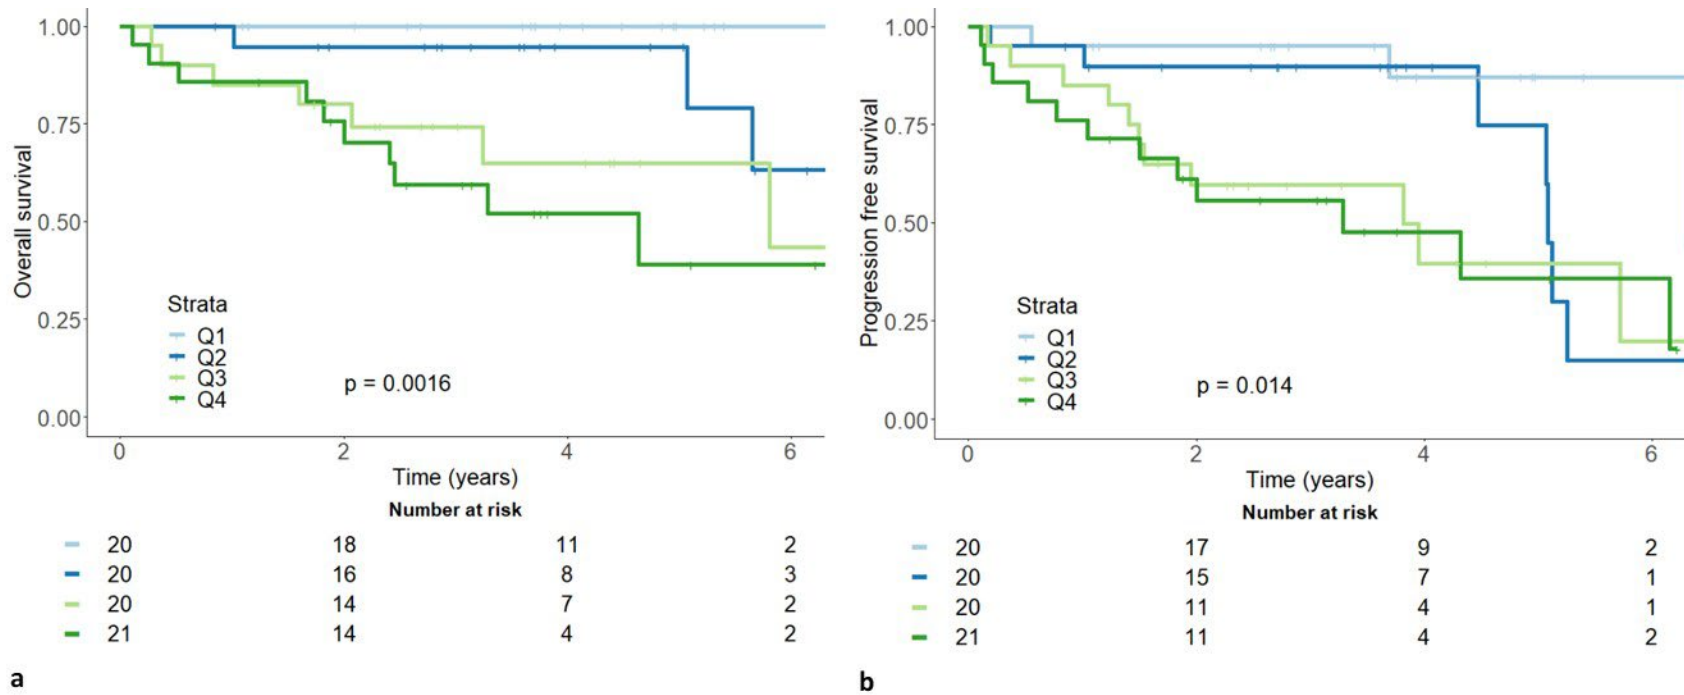

**Suppl. figure 1. Kaplan Meier showing prognostic impact of sCD163 levels by quartile. Higher sCD163 levels correlate with shorter overall survival and shorter progression free survival, providing rationale for division by median.**

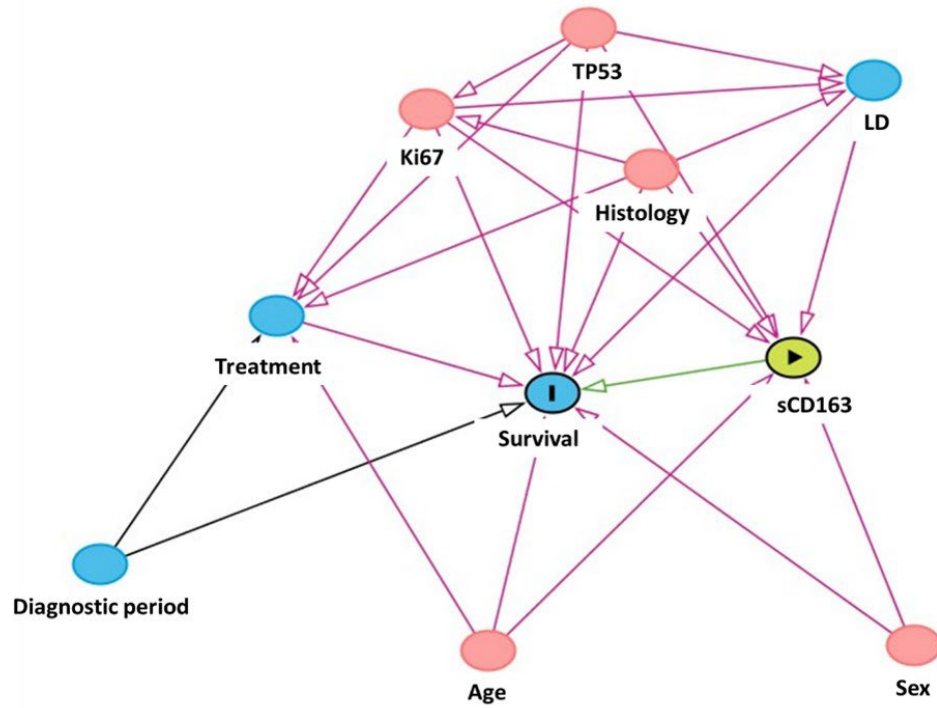

Suppl. figure 2. Directed acyclic graph showing variables chosen for multivariable analysis.

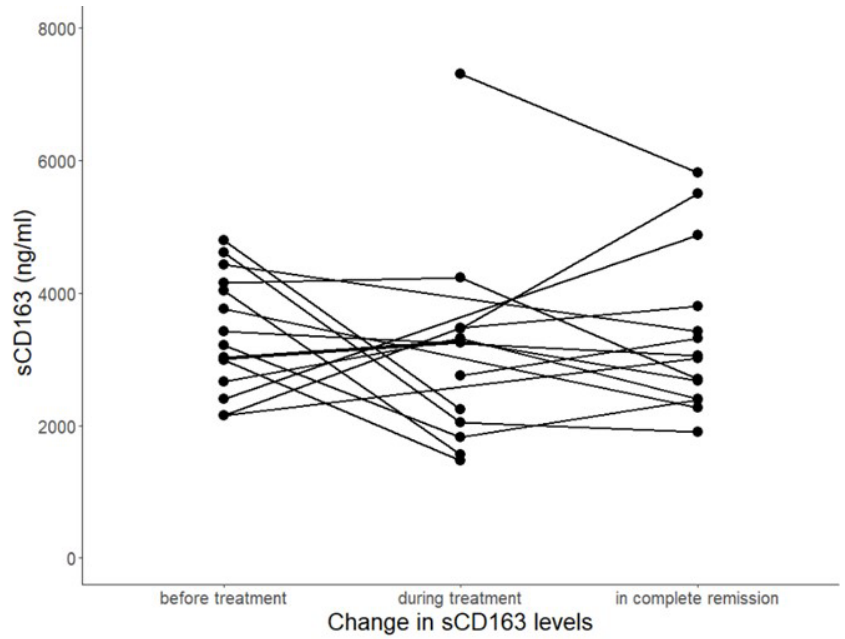

a.

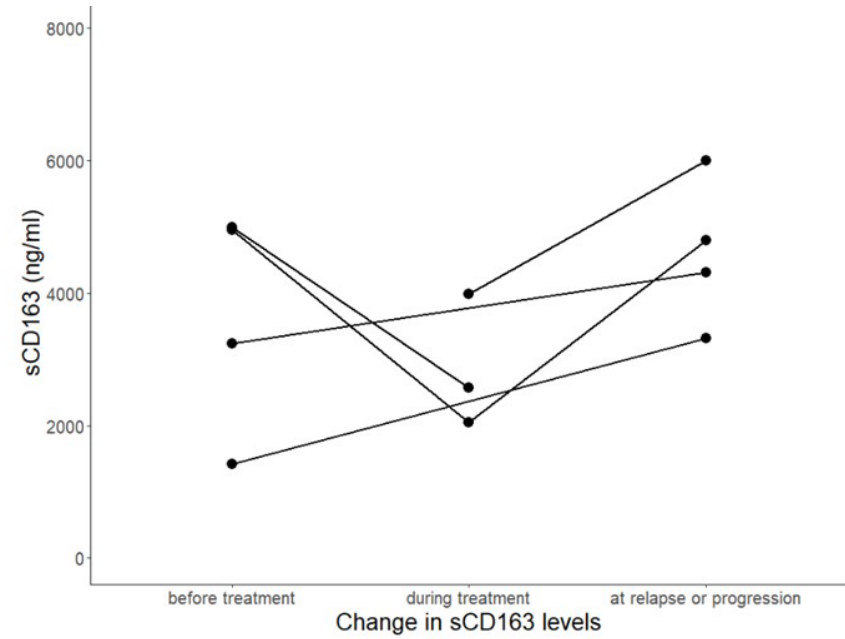

b.

**Suppl. figure 3. Spaghetti plot of sCD163 levels before, during and after treatment** in a. patients that were in complete remission after treatment, and b. patients that were in progression or at relapse after treatment.

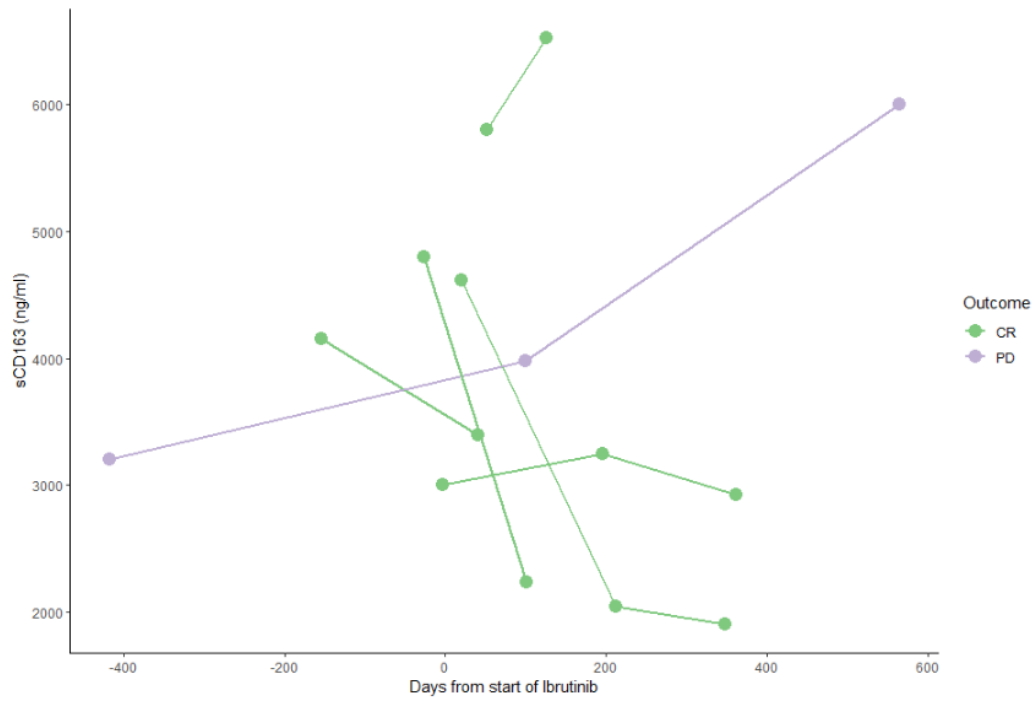

**Suppl. figure 4.** sCD163 levels in relation to Ibrutinib treatment. The outlier patient (top green line) with very high levels had another progressing haematological malignancy at the time of sampling making the interpretations difficult.

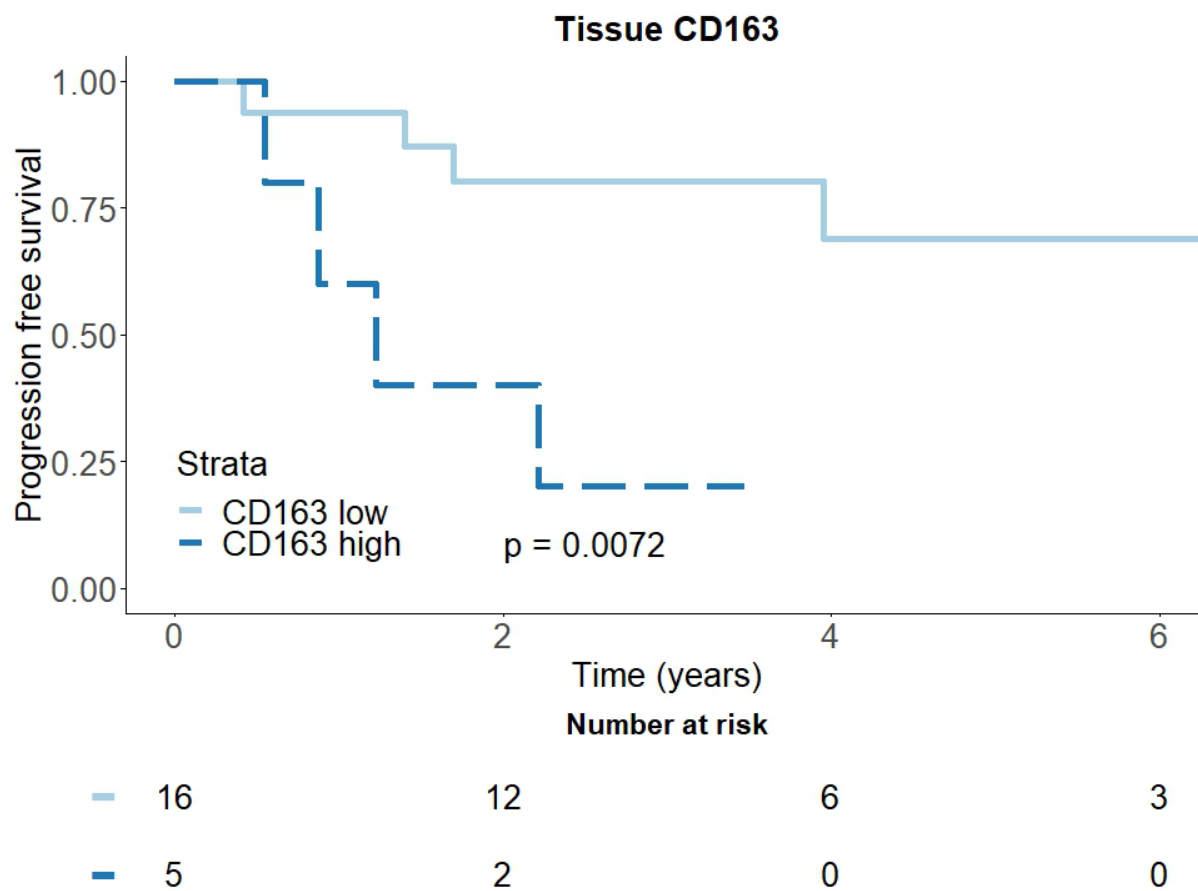

**Suppl. figure 5.** Kaplan-Meier showing worse prognosis in patients with high levels of tissue CD163 in lymph nodes and tonsils.
